# Supplementary material for: What happens when representations fail to represent? Graduate students’ mental models of organic chemistry diagrams
Source: Royal Society of Chemistry journal article supplement (doi:10.1039/c0rp90009e), 2010-01-01

# What happens when representations fail to represent? Graduate students' mental models of organic chemistry diagrams

Amanda M. Strickland, Adam Kraft and Gautam Bhattacharyya

Supplementary data

## Task 3

A.

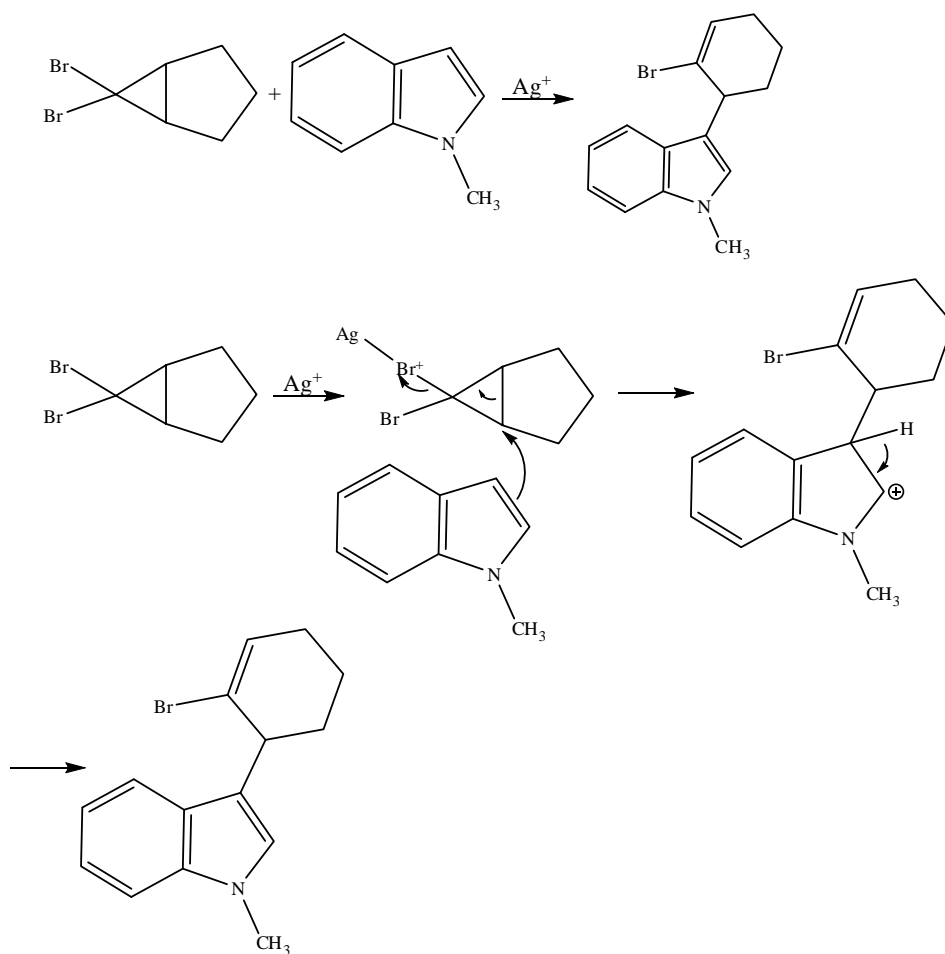

**B.**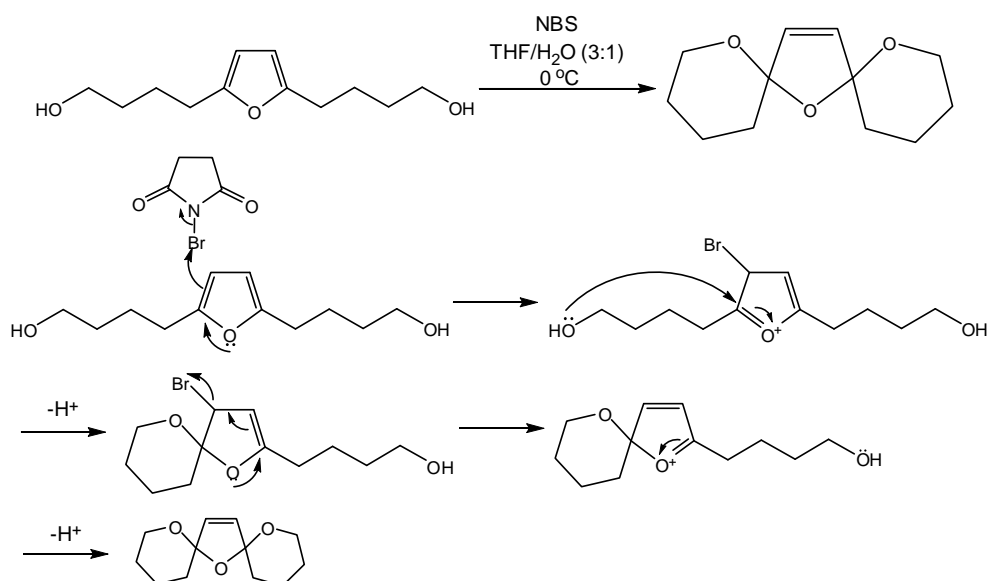**C.**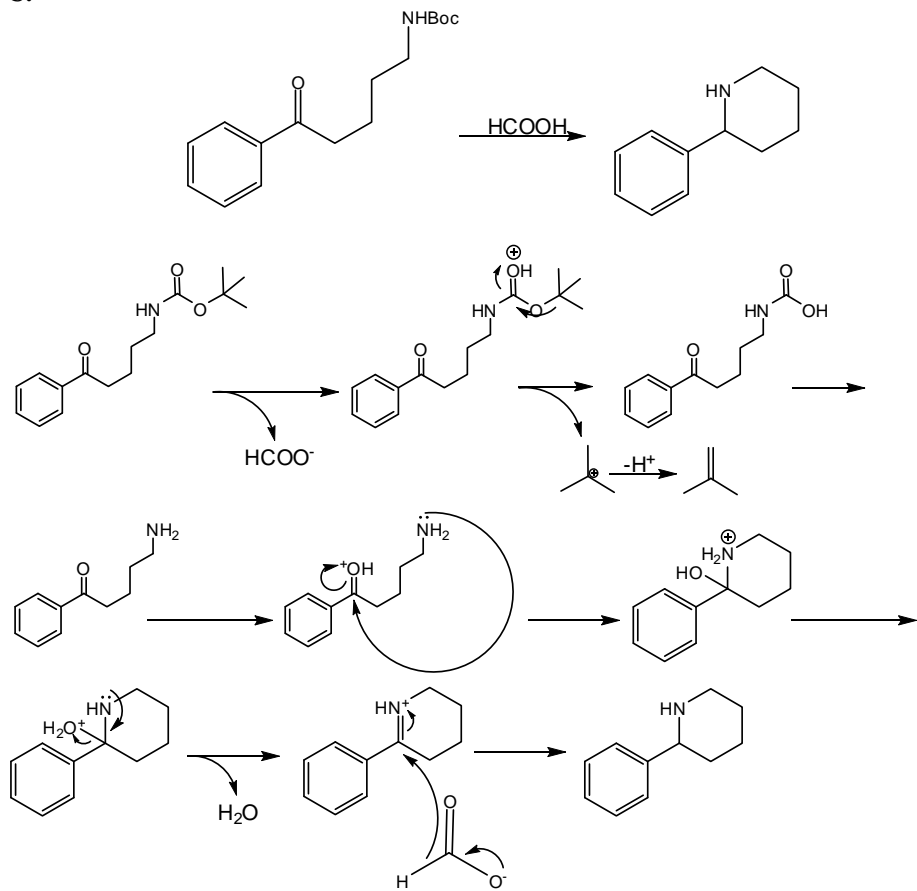

D.

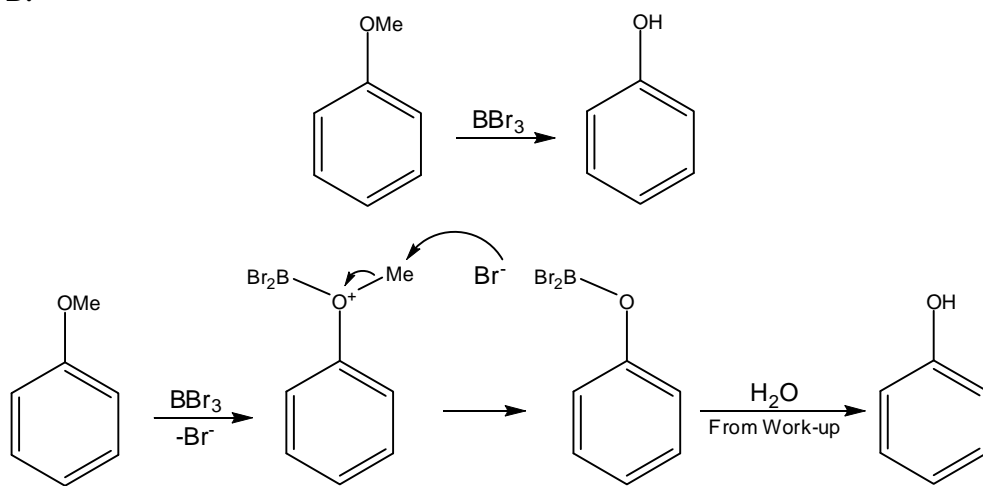

E.

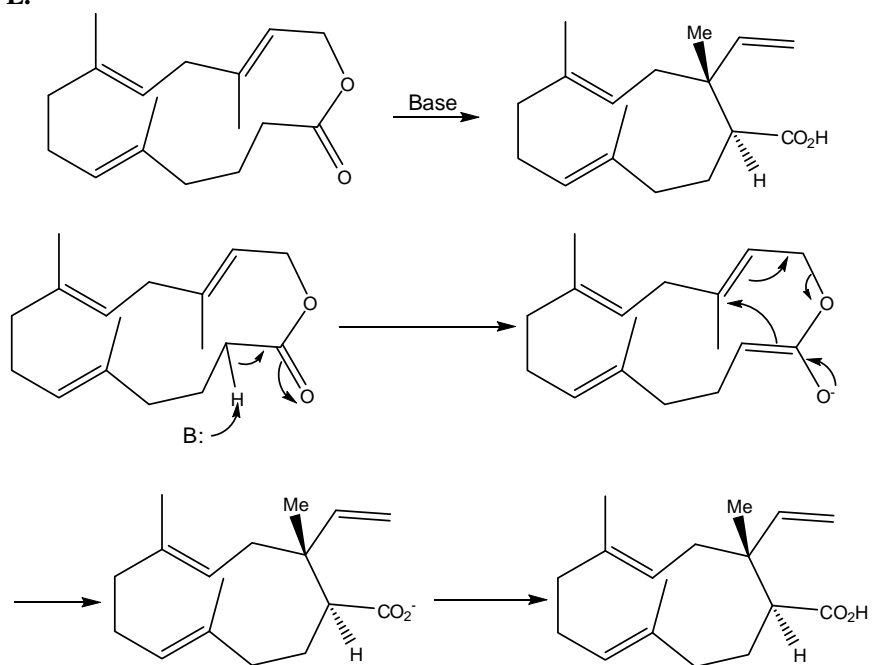

F.

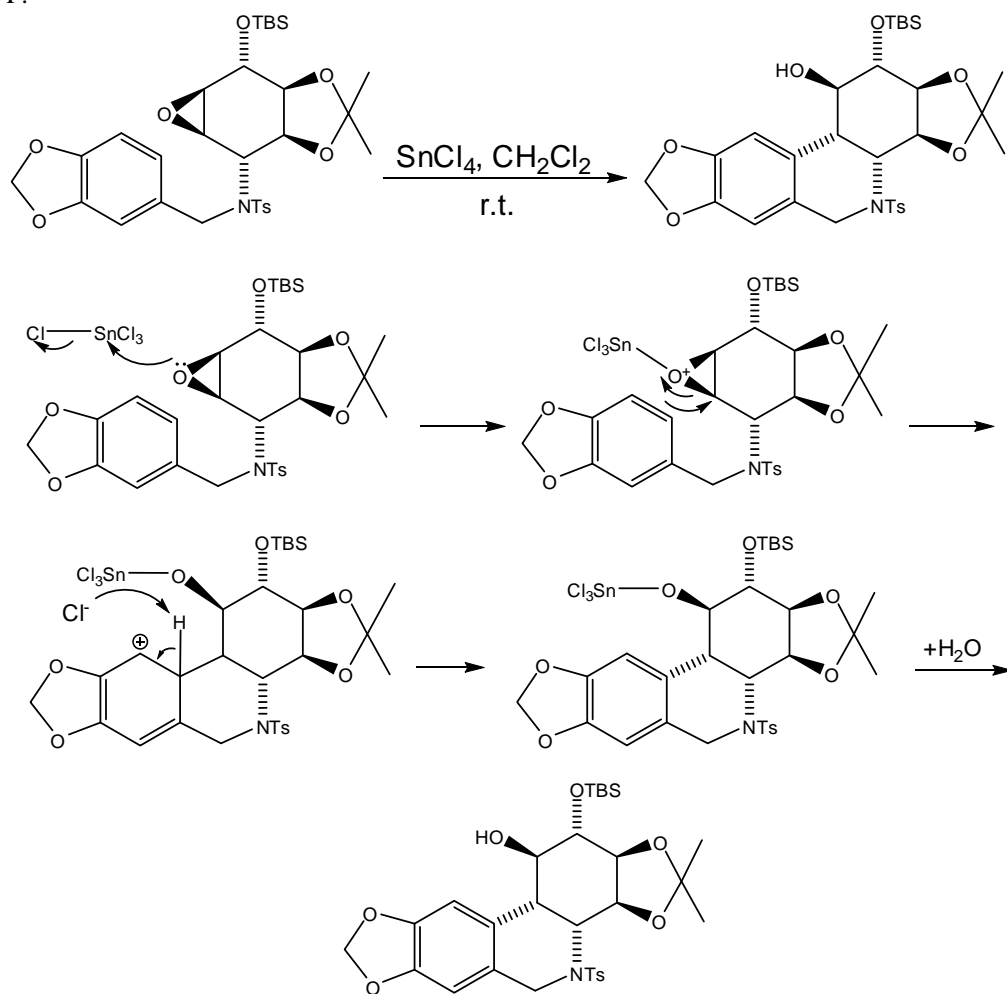

G.

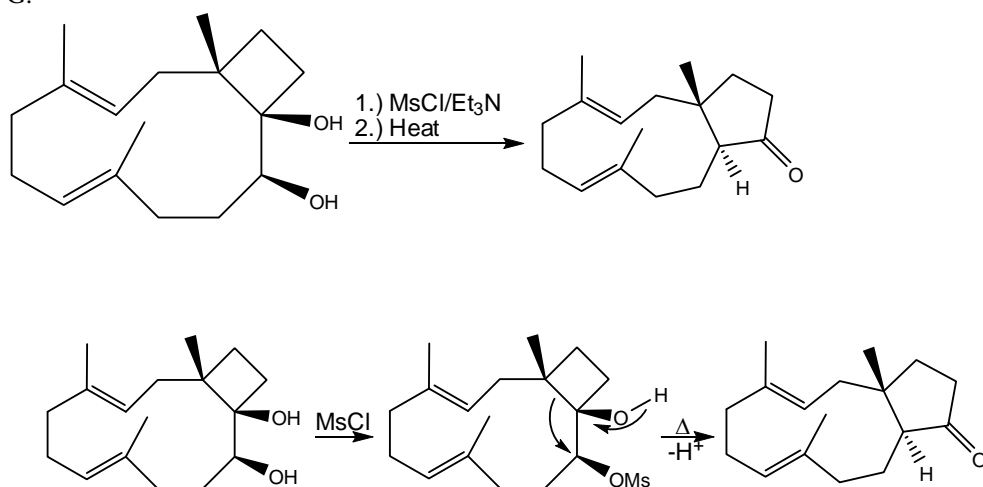

**H.**

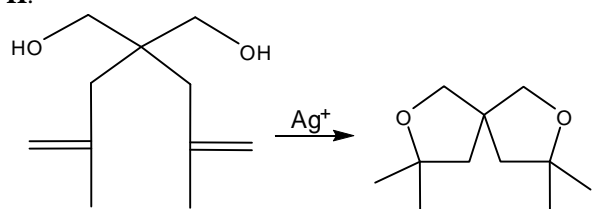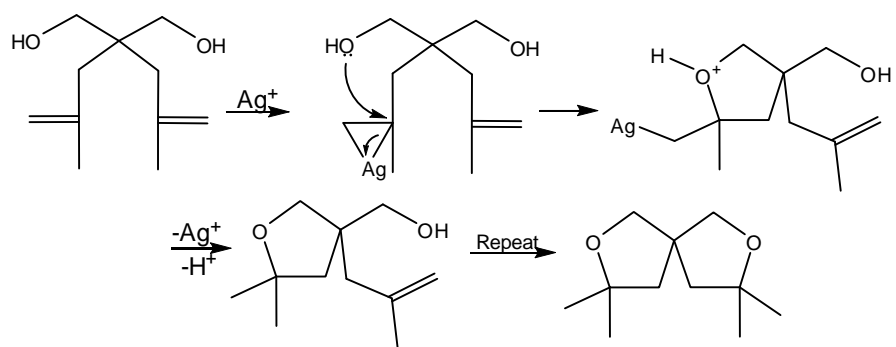

Supplement: c0rp90009eesi.pdf [file c0rp90009eesi.pdf]
